# Supplementary material
Source: MDPI journal article supplement (https://www.mdpi.com/2072-4292/7/11/14530)
Supplement: s1 [file s1]

**OPEN ACCESS**

***remote sensing***

**ISSN 2072-4292**

www.mdpi.com/journal/remotesensing

Supplementary Information

Spatiotemporal Variation in Mangrove Chlorophyll Concentration Using Landsat 8. *Remote Sens*. 2015, *7*, pp–pp.

Julio Pastor-Guzman 1, Peter M. Atkinson 1,2,3,4,†, Jadunandan Dash 1,* and
Rodolfo Rioja-Nieto 5

1 Global Environmental Change and Earth Observation Research Group, Geography and Environment, University of Southampton, Southampton SO17 1BJ, UK;
E-Mails: J.Pastor-Guzman@soton.ac.uk (J.P.-G.); pma@lancaster.ac.uk (P.M.A.)

2 Faculty of Science and Technology, Lancaster University, Lancaster LA1 4YR, UK

3 Faculty of Geosciences, University of Utrecht, Heidelberglaan 2, Utrecht CS 3584, The Netherlands

4 School of Geography, Archaeology and Palaeoecology, Queen’s University Belfast, Belfast BT7 1NN, Northern Ireland, UK

5 National Autonomous University of Mexico, Academic Unit Sisal, Faculty of Sciences, Sisal, Yucatan 97355, Mexico; E-Mail: rrioja@ciencias.unam.mx

**†**The author contributed equally to this work.

***** Author to whom correspondence should be addressed; E-Mail: J.DASH@soton.ac.uk;
Tel.: +23-8059-7347.

Spatiotemporal variation in mangrove chlorophyll concentration using Landsat 8.

**Table S1.** Calibration equations reported in the literature.

| **Equation** | ***R2*** | **Author** |
| --- | --- | --- |
|  | 0.94 | [1] |
|  | 0.96 | [2] |
|  | 0.89 | [3] |
|  | 0.89 | [4] |
|  | 0.68 | [5] |
|  | 0.93 | [6] |
|  | 0.88 | [7] |
|  | 0.79 | [8] |
|  | 0.82 | [9] |
|  | 0.99 | [10] |
|  | 0.91 | [11] |


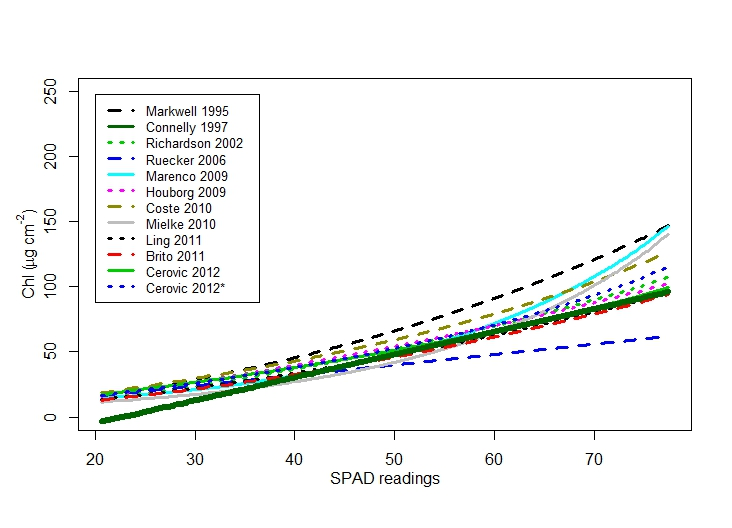


**Figure S1.** Comparison of estimated Chl (‎μg·cm−2) values from different calibration equations available in the literature. This study used the Connelly [30] equation because it is based on *R. mangle*, the dominant species in the study area. Note: Cerovic *et al.* [59] presented two equations in their paper, one derived from their analysis and one consensus equation based on eight models. In this plot Cerovic 2012* (blue dotted line) refers to the consensus equation.

**References:**

1. Markwell, J.; Osterman, J.C.; Mitchell, J.L. Calibration of the Minolta SPAD-502 leaf chlorophyll meter. *Photosynth. Res.* **1995**, *46*, 467–472.
2. Richardson, A.D.; Duigan, S.P.; Berlyn, G.P. An evaluation of noninvasive methods to estimate foliar chlorophyll content. *New Phytol.* **2002**, *153*, 185–194.
3. Coste, S.; Baraloto, C.; Leroy, C.; Marcon, É.; Renaud, A.; Richardson, A.D.; Roggy, J.-C.; Schimann, H.; Uddling, J.; Hérault, B. Assessing foliar chlorophyll contents with the SPAD-502 chlorophyll meter: A calibration test with thirteen tree species of tropical rainforest in French Guiana. *Ann. For. Sci.* **2010**, *67*, 607–607.
4. Mielke, M.S.; Schaffer, B.; Li, C. Use of a SPAD meter to estimate chlorophyll content in
   *Eugenia Uniflora L.* leaves as affected by contrasting light environments and soil flooding. *Photosynthetica* **2010**, *48*, 332–338.
5. Connelly, X.M. The Use of a chlorophyll meter (SPAD-502) for field determinations of red mangrove (*Rhizophora Mangle L.*) leaf chlorophyll amount. *NASA Univ. Res. Cent. Tech. Adv. Educ. Aeronaut. Space Auton. Earth Environ.* **1997**, *1*, 198–190.
6. Houborg, R.; Anderson, M.C. Utility of an image-based canopy reflectance modeling tool for remote estimation of LAI and leaf chlorophyll content at regional scales. *J. Appl. Remote Sens.* **2009**, *3*, 29–29.
7. Cerovic, Z.G.; Masdoumier, G.; Ghozlen, N.B.; Latouche, G. A new optical leaf-clip meter for simultaneous non-destructive assessment of leaf chlorophyll and epidermal flavonoids. *Physiol. Plant.* **2012**, *146*, 251–260.
8. Marenco, R.A.; Antezana-Vera, S.A.; Nascimento, H.C.S. Relationship between specific leaf area, leaf thickness, leaf water content and SPAD-502 readings in six Amazonian tree species. *Photosynthetica* **2009**, *47*, 184–190.
9. Rücker, G. R.; Wouter, A. D.; Lamers, J.; Ibragimov, N.; Kienzler, K.; Strunz, G.; Mueller, A.; Vlek, P. L. Regional estimation of leaf chlorophyll in cotton in Uzbekistan by upscaling a vegetation index from plant scale to PROBA-1/CHRIS hyperspectral satellite data. In Proceedingsof the 4th ESA Proba-1/CHRIS Workshop; Frascati, Esrin, Italy, April 2006; pp. 1–8.
10. Ling, Q.; Huang, W.; Jarvis, P. Use of a SPAD-502 meter to measure leaf chlorophyll concentration in Arabidopsis thaliana. *Photosynth. Res*. **2011**, 107, 209–214.
11. Brito, G. G.; Sofiatti, V.; Brandão, Z. N.; Silva, V. B.; Silva, F. M.; Silva, D. A. Non-destructive analysis of photosynthetic pigments in cotton plants*. Acta Sci. Agron*. **2011**, 33, 671–678.

© 2015 by the authors; licensee MDPI, Basel, Switzerland. This article is an open access article distributed under the terms and conditions of the Creative Commons Attribution license (http://creativecommons.org/licenses/by/4.0/).
